# Supplementary material for: An ATP responsive fluorescent supramolecular assembly based on a polyelectrolyte and an AIE active tetraphenylethylene derivative
Source: Royal Society of Chemistry journal article supplement (doi:10.1039/d0ob01661f), 2020-01-01
Supplement: d0ob01661f1.pdf [file d0ob01661f1.pdf]

**Supporting Information**

**An ATP responsive fluorescent supramolecular  
assembly based on polyelectrolyte and AIE active  
tetraphenylethylene derivative**

*Vidya R. Singh,<sup>a</sup> Jotiram N. Malegaonkar,<sup>b,c</sup> Sidhanath V. Bhosale,<sup>b,c</sup> and Prabhat K. Singh<sup>a,d,\*</sup>*

<sup>a</sup>Radiation & Photochemistry Division, Bhabha Atomic Research Centre, Mumbai 400 085,  
INDIA

<sup>b</sup>Polymers and Functional Materials Division, CSIR-Indian Institute of Chemical Technology,  
Hyderabad- 500 007, INDIA

<sup>c</sup>Academy of Scientific and Innovative Research (AcSIR), Ghaziabad - 201 002, Uttar Pradesh,  
INDIA

<sup>b</sup>Homi Bhabha National Institute, Training School Complex, Anushaktinagar, Mumbai 400 094,  
INDIA

\*Authors for correspondence: Email: [prabhatk@barc.gov.in](mailto:prabhatk@barc.gov.in); [prabhatsingh988@gmail.com](mailto:prabhatsingh988@gmail.com)

Tel. 91-22-25590894, Fax: 91-22-5505151

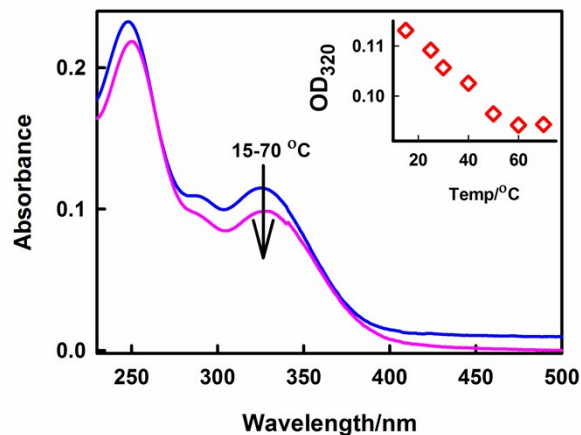

**Figure S1:** Ground state absorption spectra of Su-TPE (9.5  $\mu\text{M}$ )-PAH (0.17 $\mu\text{M}$ ) at 15°C (blue line) and 70°C (pink line). **Inset:** Variation of absorbance at 320 nm with increase in temperature.

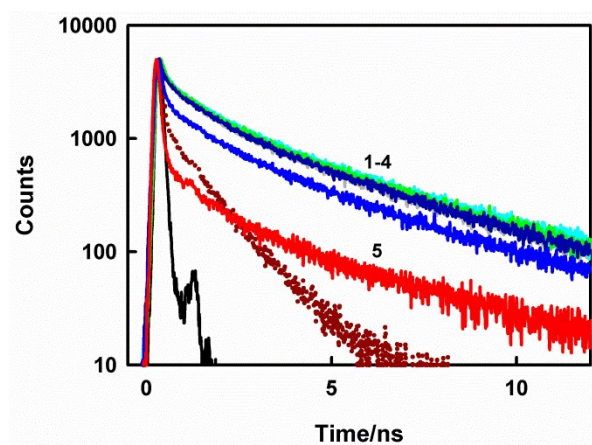

**Figure S2:** Transient decay trace ( $\lambda_{\text{ex}}$ =374 nm,  $\lambda_{\text{em}}$  =470 nm) of Su-TPE (9.5  $\mu\text{M}$ )-PAH (0.054 $\mu\text{M}$ ) on interaction with various analytes at same concentration (1) ADP (2) AMP (3)  $\text{Na}_2\text{HPO}_4$  (4) PPI (5) ATP. Dotted line represents decay traces of Su-TPE in water. The solid black line represents instrument response function (IRF).

### LOD Determination

1. The fluorescence emission spectra of 10 blank measurements (Su-TPE-PAH aggregate, without the analyte of interest, which is ATP here) were recorded and fluorescence emission intensity at 470 nm was noted.
2. The standard deviation ( $\sigma$ ) of the fluorescence intensity at 470 nm (aggregate emission band) was calculated using the standard formula.

3. The slope (S) was found from the linear regression equation of the calibration curve
4. The LOD is calculated using the formula  $LOD=3.3(\sigma/S)$  which uses standard deviation of the 10 blank measurements ( $\sigma$ ) and the slope of the calibration curve (S).
